# Supplementary material
Source: PubMed Central journal article supplement (PMC11005577)

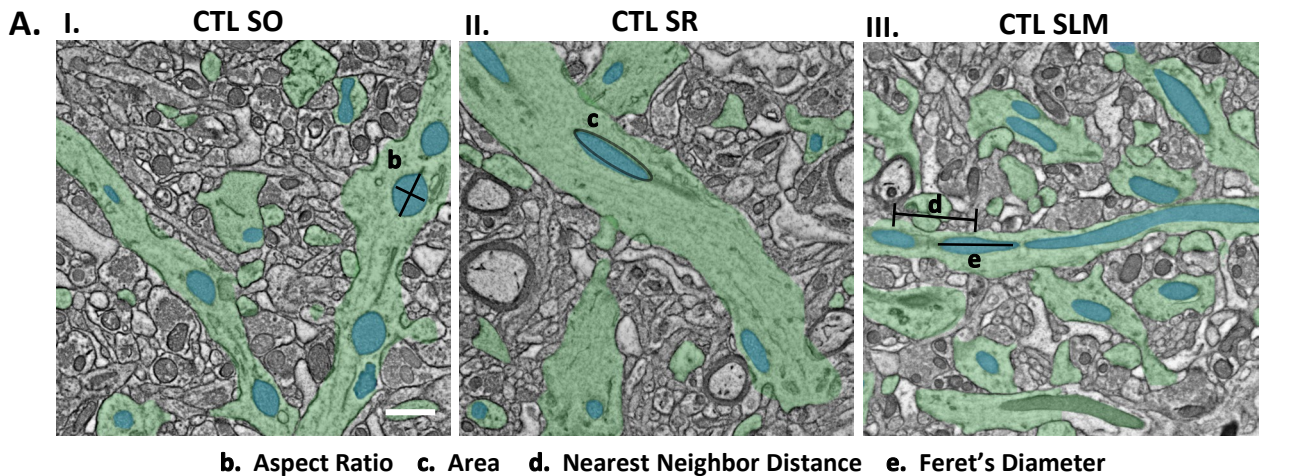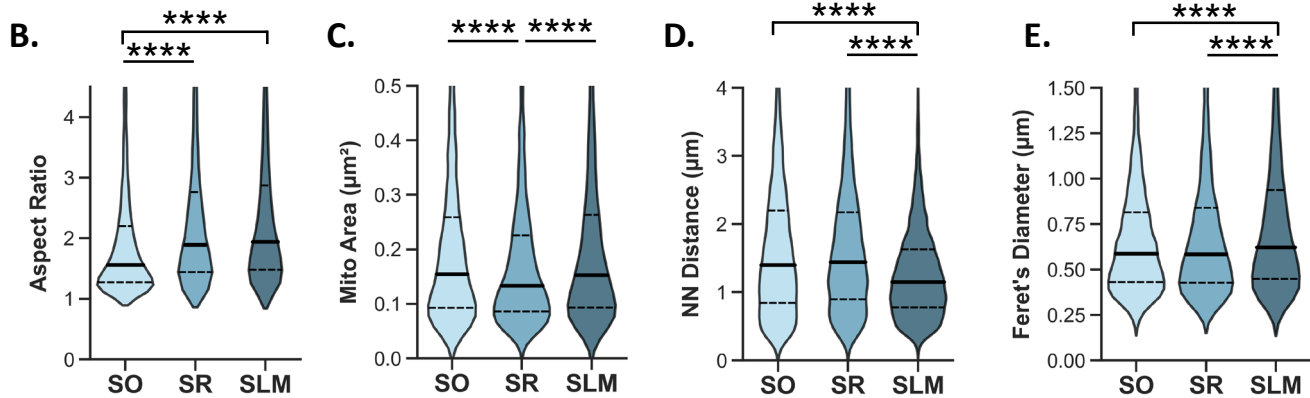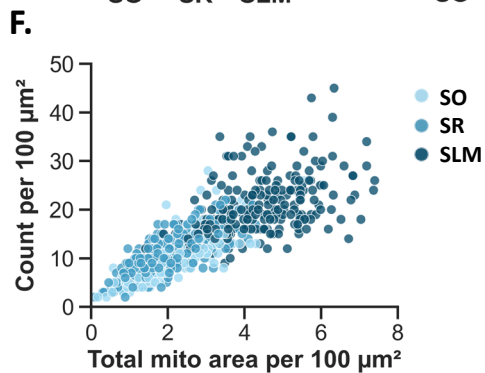

Supplement: media-2.pdf [file media-2.pdf]
