# Supplementary material
Source: PubMed Central journal article supplement (PMC11005577)

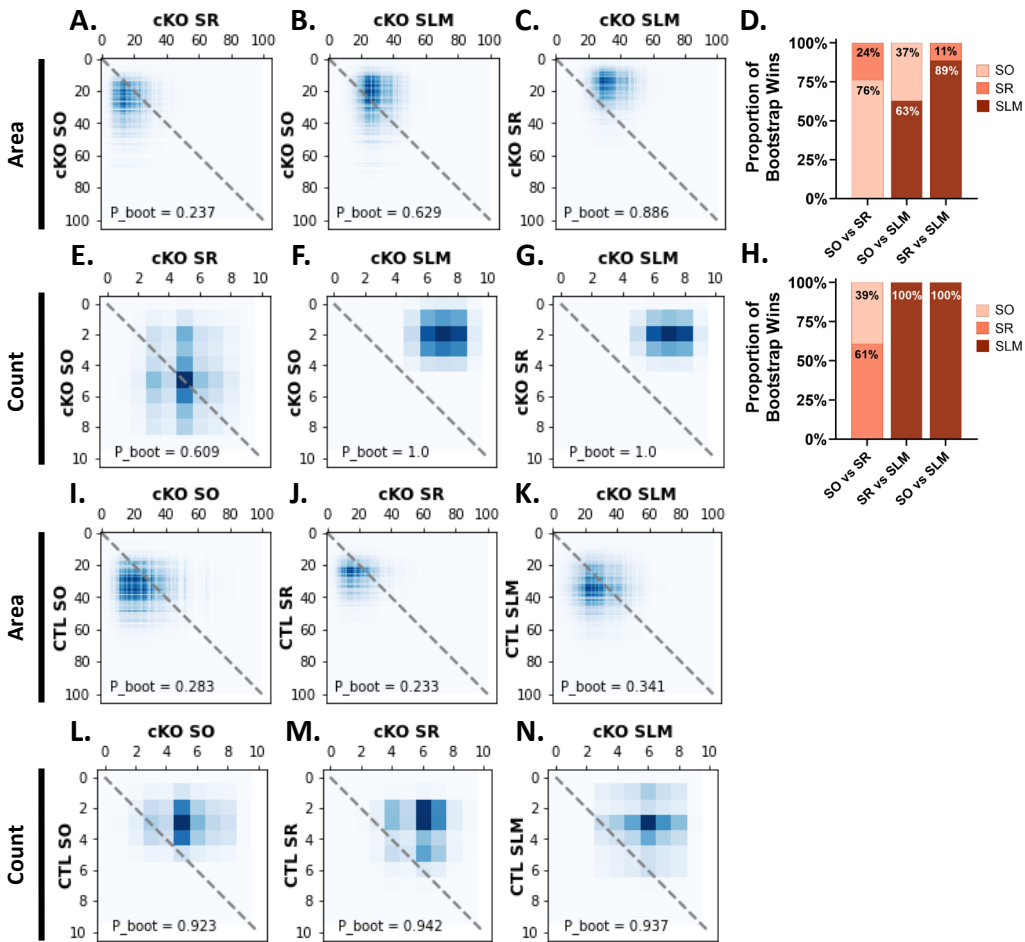

Supplement: media-4.pdf [file media-4.pdf]
